# Supplementary material for: Cardiovascular Disease Mortality in Europeans in Relation to Fasting and 2-h Plasma Glucose Levels Within a Normoglycemic Range
Source: PubMed Central journal article supplement — Diabetes Care. 2010 Apr 27;33(10):2211–6. doi: 10.2337/dc09-2328 (PMC2945162; doi:10.2337/dc09-2328), 2010-04-27
Supplement: supp_dc09-2328v092328_DC092328ONLINEAPPENDx1.pdf [file supp_dc09-2328v092328_DC092328ONLINEAPPENDx1.pdf]

## ONLINE APPENDIX

**The DECODE Study (Diabetes Epidemiology: Collaborative analysis Of Diagnostic Criteria in Europe) was started in 1997 on the initiative of the European Diabetes Epidemiology Group.**

### **Studies and investigators in this collaborative study are:**

**Demark Glostrups Study:** T Jørgensen<sup>1,2</sup>, K Borch-Johnson<sup>3</sup>. 1. Research Centre for Prevention and Health, Glostrup University Hospital, Glostrup; 2. Faculty of Health Science, University of Copenhagen, Copenhagen; 3. Steno Diabetes Center, Gentofte

**Finland East-West Study:** A. Nissinen<sup>1</sup>, J. Pekkanen<sup>1</sup>, J. Tuomilehto<sup>1,2,3</sup>. 1. Department of Health Promotion and Chronic Disease Prevention, National Public Health Institute, Helsinki; 2. Department of Public Health, University of Helsinki, Helsinki; 3. South Ostrobothnia Central Hospital, Seinäjoki,

**Helsinki Policemen Study:** M. Pyörälä, K. Pyörälä. Institute of Clinical Medicine, Faculty of Health Sciences, University of Eastern Finland, Kuopio

**National FINRISK 1987 and 1992 Cohorts:** J. Tuomilehto<sup>1,2,3</sup>, P.Jousilahti<sup>2</sup>, J. Lindström<sup>2</sup>. 1. Department of Public Health, University of Helsinki, Helsinki; 2. Department of Health Promotion and Chronic Disease Prevention, National Public Health Institute, Helsinki; 3. South Ostrobothnia Central Hospital, Seinäjoki

**National FINRISK 2002 Cohort:** J. Tuomilehto<sup>1,2</sup>, T. Laatikainen<sup>2</sup>, M. Peltonen<sup>2</sup>, J. Lindström<sup>2</sup>. 1. Department of Public Health, University of Helsinki, Helsinki; 2. Diabetes Prevention Unit, Department of Chronic Disease Prevention, National Institute for Health and Welfare, Helsinki

**Oulu Study:** S Keinänen-Kiukaanniemi<sup>1,2,3</sup>, U. Rajala<sup>1</sup>, M. Laakso<sup>1,3</sup>. 1. The Institute of Health Sciences, University of Oulu, Oulu; 2. Oulu Health Centre, Oulu; 3. Oulu University Hospital, Unit of General practice, Oulu

**Vantaa Study:** R. Tilvis<sup>1</sup>, J. Tuomilehto<sup>2,3</sup>. Division of geriatrics, Department of medicine, University of Helsinki, Helsinki. 2. Diabetes Prevention Unit, Department of Chronic Disease Prevention, National Institute for Health and Welfare, Helsinki; 3. Department of Public Health, University of Helsinki, Helsinki

**Italy Cremona Study:** M.P. Garancini<sup>1</sup>, G Calori<sup>1</sup>, G Ruotolo<sup>1,2</sup>, S Mannino<sup>3</sup>, M Villa<sup>3</sup>. 1. Division of Metabolic and Cardiovascular Diseases, San Raffaele Scientific Institute, Milan. 2. AstraZeneca R&D Mölndal, Sweden. 3.ASL Provincia di Cremona, Cremona

**Poland POLMONICA:** A. Pajak, E. Kawalec. Department of Epidemiology and Population Studies, Institute of Public Health, Unit of Health Care, Collegium Medicum Jagiellonian University, Krakow

**Sweden Northern Sweden MONICA:** S. Söderberg<sup>1,2</sup>, M. Eliasson<sup>1</sup>. Department of Public Health and Clinical Medicine, Cardiology, University of Umeå, Umeå; 2. Baker IDI Heart and Diabetes Institute, Melbourne, Australia

**The Uppsala Longitudinal Study of Adult Men (ULSAM):** B. Zethelius. Department of Public Health/Geriatrics, Uppsala University Hospital, Uppsala

**Malmo Preventive Project:** PM. Nilsson and G. Berglund. Department of Clinical Sciences, Lund University, University Hospital, Malmö

**The Netherlands The Hoorn Study:** J.M. Dekker<sup>1</sup>, G. Nijpels<sup>1</sup>, C.D.A. Stehouwer<sup>2</sup>. 1. Institute for Research in Extramural Medicine, Vrije Universiteit Medical Center, Amsterdam; 2.

Department of Internal Medicine and Cardiovascular Research Institute Maastricht , Maastricht University Medical Centre, AZ Maastricht

**Zutphen Study:** Ed. Feskens. Department of Chronic Disease and Environmental Epidemiology, National Institute of Public Health and Environmental Protection, Bilthoven

**United Kingdom Ely:** N.J. Wareham. MRC Epidemiology Unit, Strangeways Research Labs, Cambridge

**Newcastle Heart Project:** N. Unwin<sup>1</sup>, N. Ahmad<sup>1</sup>, K.G.M.M. Alberti<sup>2</sup>, L. Hayes<sup>1</sup>. 1. Department of Medicine and Epidemiology and Public Health, University of Newcastle, Newcastle; 2. Imperial College, St Mary's Campus, St Mary's Hospital, London

**The Gooding Study:** R. W. Morris, J. S. Yudkin, M. Gould, A. Haines. Department of Primary Care & Population Sciences, Royal Free and University College Medical School, London

**The Whitehall II Study:** M.G.Marmot<sup>1</sup>, A.G. Tabák<sup>1,2</sup>, M. Kivimäki<sup>1,3</sup>, E.J. Brunner<sup>1</sup>, D.R. Witte<sup>1,4</sup>. 1. Department of Epidemiology and Public Health, University College London, London; 2. Semmelweis University Faculty of Medicine, 1<sup>st</sup> Department of Medicine, Budapest, Hungary; 3. Finnish Institute of Occupational Health, Helsinki, Finland; 4. Steno Diabetes Center, Gentofte, Denmark

### Supplemental Table.

Hazard ratios and their 95% confidence intervals for death from cardiovascular disease (CVD), Non-CVD and all-cause for Group II as compared with Group I estimated in two FPG subgroups.

|           | Model 1          |                             | Model 2          |                             |
|-----------|------------------|-----------------------------|------------------|-----------------------------|
|           | FPG ≤ 5.6 mmol/l | 5.6mmol/l < FPG <6.1 mmol/l | FPG ≤ 5.6 mmol/l | 5.6mmol/l < FPG <6.1 mmol/l |
| N         | 18237            | 5203                        | 13457            | 3871                        |
| CVD       | 1.27 (1.08-1.48) | 1.26 (1.00-1.59)            | 1.33(1.09-1.63)  | 1.31(1.00-1.73)             |
| Non-CVD   | 1.12 (0.95-1.30) | 0.87 (0.66-1.14)            | 1.18(0.97-1.43)  | 0.74(0.52-1.06)             |
| All-cause | 1.19 (1.07-1.33) | 1.08 (0.90-1.28)            | 1.24(1.08-1.43)  | 1.05(0.84-1.30)             |

Model 1, adjusted for age, cohort, gender, body mass index, total cholesterol, smoking and hypertension status. Model 2, Model 1 plus fasting insulin. FPG, fasting plasma glucose, 2hPG, 2 hour plasma glucose. Group I, 2hPG ≤ FPG; Group II, 2hPG > FPG.
